# 1 A Deep Semi-Supervised Framework for Accurate 2 Modelling of Orphan Sequences

3 Lewis Moffat<sup>1</sup> and David T. Jones<sup>1,+</sup>

4 <sup>1</sup>Department of Computer Science, University College London, Gower Street, London WC1E 6BT; and Francis  
5 Crick Institute, 1 Midland Road, London NW1 1AT

6 <sup>+</sup>d.t.jones@ucl.ac.uk

## 7 Abstract

8 Accurate modelling of a single orphan protein sequence in the absence of homology information has remained a  
9 challenge for several decades. Although not as performant as their homology-based counterparts, single-sequence  
10 bioinformatic methods are not constrained by the requirement of evolutionary information and so have a swathe  
11 of applications and uses. By taking a bioinformatics approach to semi-supervised machine learning we develop  
12 Profile Augmentation of Single Sequences (PASS), a simple but powerful framework for developing accurate  
13 single-sequence methods. To demonstrate the effectiveness of PASS we apply it to the mature field of secondary  
14 structure prediction. In doing so we develop S4PRED, the successor to the open-source PSIPRED-Single method,  
15 which achieves an unprecedented  $Q_3$  score of 75.3% on the standard CB513 test. PASS provides a blueprint for  
16 the development of a new generation of predictive methods, advancing our ability to model individual protein  
17 sequences.

## 18 Main

19 Over the past two decades, sequence-based bioinformatics has made leaps and bounds towards better understanding  
20 the intricacies of DNA, RNA, and proteins. Large sequence databases<sup>1</sup> have facilitated especially powerful  
21 modelling techniques that use homology information for a given query sequence to infer aspects of its function  
22 and structure<sup>2</sup>. A keen example of this progress is in current methods for protein structure prediction that utilize  
23 multiple sequence alignments (MSAs) to accurately infer secondary and tertiary structure<sup>3-5</sup>. Unfortunately, much  
24 of this progress has not extended to orphan sequences, a very important but very difficult to model class of  
25 sequences which have few to no known homologous sequences<sup>5-7</sup>. Also, even when homologues are available,  
26 multiple sequence alignment is often too slow to apply to the entirety of a large sequence data bank, and so  
27 improved annotation tools which can work with just a single input sequence are also vital in maintaining resources  
28 such as InterPro<sup>8</sup>.

29 A concurrent development is the recent permeation of deep learning methods into bioinformatics; powerful  
30 machine learning models that are extremely data hungry but capable of highly accurate inference<sup>3</sup>. Deep learning  
31 approaches have seen success in bioinformatics but progress has been constrained as large labelled biological  
32 datasets are not always abundantly available<sup>2</sup>. In many biological settings, acquiring labeled data for even a  
33 single example can be very costly, although the data itself is often abundant. A clear example is determining high  
34 resolution protein structure data. This is evident in that, at current, there are millions of unannotated sequences in  
35 the UniProtKB<sup>1</sup> but a comparatively much smaller number of structures in the PDB<sup>9</sup>.

36 Here we present Profile Augmentation of Single Sequences (PASS), a general framework for mapping multiple  
37 sequence information to cases where rapid and accurate predictions are required for orphan sequences. This simple  
38 but powerful framework draws inspiration from Semi-Supervised Learning (SSL) to enable the creation of massive  
39 single-sequence datasets in a way that is biologically intelligent and conceptually simple. SSL methods represent  
40 powerful approaches for developing models that utilize both labelled and unlabelled data. Where some recent  
41 works<sup>10,11</sup> have looked to take advantage of unlabelled biological sequence data using unsupervised learning,  
42 borrowing from techniques in natural language processing<sup>12,13</sup>, we instead look to modern SSL methods like  
43 FixMatch<sup>14</sup> for inspiration. These methods have demonstrated that psuedo-labelling, amongst other techniques,  
44 can significantly improve model performance<sup>14-16</sup>. Pseudo-labelling techniques use the model being trained to  
45 assign artificial labels to unlabelled data, which is then incorporated into further training of the model itself<sup>16</sup>.

PASS uses a bioinformatics-based approach to pseudo-labelling to develop a dataset for a given prediction task before training a predictive single-sequence model. First, a large database of sequences is clustered into MSAs. Each MSA is then used as input to an accurate homology-based predictor. The predictions are then treated as pseudo-labels for a single sequence from the MSA. This allows a large unlabelled set of single sequences to be converted into a training set with biologically plausible labels, that can be combined with real labelled data, for training a deep learning based predictor. As an exemplar of the effectiveness of the PASS framework we apply it to the well explored field of single-sequence secondary structure prediction and achieve unprecedented results in the form of Single-Sequence Secondary Structure PREDictor (S4PRED), the next iteration of PSIPRED-Single, our current method. S4PRED achieves a state-of-the-art  $Q_3$  score of 75.3% on the standard CB513 test set<sup>17</sup>. This performance approaches the first version of the homology-based PSIPRED<sup>18</sup> and represents a leap in performance for single-sequence based methods in secondary structure prediction (Figure 1).

In the past two decades secondary structure prediction has become an invaluable tool across the cutting edge of protein science, particularly in areas like cryo-electron microscopy<sup>19,20</sup>, tertiary structure prediction<sup>5</sup>, and protein design<sup>21</sup>. Starting from a three class accuracy ( $Q_3$ ) of  $\sim 76\%$ <sup>18</sup> in the late 1990's, our renowned secondary structure prediction tool, PSIPRED, has grown to a current state-of-the-art  $Q_3$  of 84.2%, and is used globally in both experimental and computational research<sup>22</sup>.

PSIPRED, along with other methods, is able to produce high accuracy predictions by leveraging valuable homology information found in MSAs<sup>23</sup>. This is typically done by constructing a MSA for a given query sequence and then converting it into a PSI-BLAST<sup>24</sup> profile to be used as features for the predictor, along with the original protein sequence<sup>18,23</sup>. This approach is in stark contrast to single-sequence methods, like PSIPRED-Single<sup>22</sup>, that are designed to predict secondary structure based only on a single query sequence, without relying on homology information. Unfortunately, over the past decades, single-sequence methods have been slow to improve relative to homology based methods, as can be seen in Figure 1. Currently, the most performant single-sequence methods achieve low  $Q_3$  scores of 71-72%<sup>22,25-27</sup>, where homology based methods are achieving scores of  $> 84\%$ <sup>22,27,28</sup> and are approaching a hypothesized theoretical maximum of 88-90%<sup>29</sup>.

Accurate single-sequence prediction enables the modelling of any given sequence without the constraints of homology, which, from both a theoretical and practical perspective, represents an incredibly valuable research prospect with a plethora of use cases. The first and most apparent of these is being able to better model any part of the known protein space, especially given that a quarter of sequenced natural proteins are estimated to have no known homologues<sup>7</sup> and an even larger portion are inaccessible to homology modelling<sup>5,6,40</sup>. For example, a particularly important area where this is often the case is viral sequence analysis. The structures of viral proteins are often attractive targets for the development of antiviral drugs or the development of vaccines<sup>41</sup>, however, viral sequences tend to be highly diverse and typically have no detectable homologues, making structural modelling difficult<sup>41-43</sup>. Another example is being able to better model the homology-poor "dark proteome"<sup>6</sup>, the contents of which likely holds yet to be discovered functional and structural biology<sup>5</sup>. The value of single-sequence methods also extends outside of natural proteins to areas like *de novo* protein design<sup>21</sup>, where novel sequences and structures typically, by their very design, have no homologues<sup>44</sup>.

Even in the case of a sequence having known homologues, single-sequence methods have many valuable uses. One clear example is in variant effects<sup>43</sup>, where methods like PSIPRED that use MSAs are limited because their predictions for a given sequence will be biased towards a family "average"<sup>2</sup>. Single-sequence methods avoid this bias and have the potential to better model the changes in secondary structure across a family even for highly divergent members. This also extends to being able to better model large single-species insertions that intrinsically have no homology information. Being able to avoid the bias of homology methods could also benefit protein engineering tasks<sup>45</sup>, where the aim may be to generate a sequence that is highly divergent from its homologues.

Not only do single-sequence methods aid in a variety of scientific problems, they also directly tackle research tasks like the protein structure prediction problem. Recent advances in tertiary structure prediction demonstrate highly accurate *ab initio* structure modelling when homologous sequences are available, but successful prediction without homology information remains elusive<sup>4,46</sup>. Single-sequence methods directly address the prediction of protein structure sans homology information, and improved predictors have the potential to lay the groundwork for future steps towards the herculean task of single-sequence tertiary structure prediction.

## Results

### Generating an artificially labelled dataset

For S4PRED, we use the PASS framework to develop a pseudo-labelling approach that is used to generate a large set of single sequences with highly accurate artificial labels. The first step is taking a large set of unlabelled protein

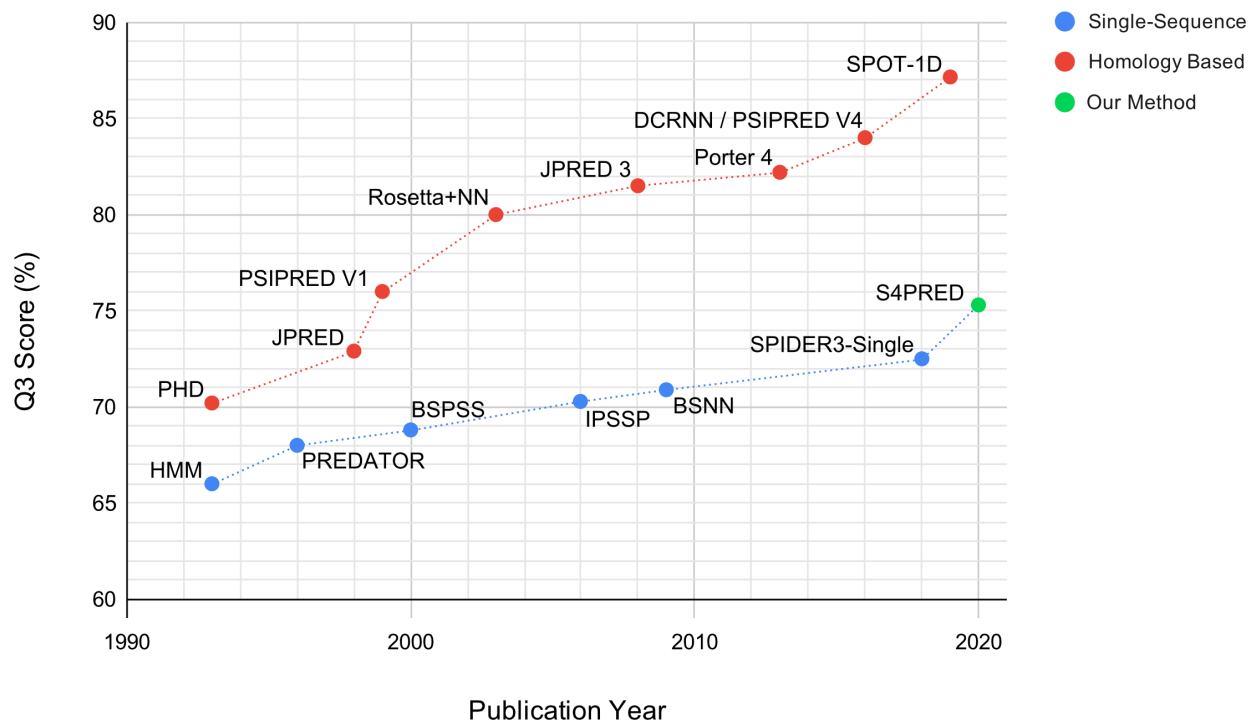

**Figure 1.** Plot showing reported test  $Q_3$  scores for a range of published secondary structure prediction methods over the previous three decades. This includes single-sequence methods<sup>25,26,30-33</sup> and homology methods<sup>18,28,34-39</sup> separately to provide an illustrative view of how single-sequence methods have improved very slowly, compared to homology methods, over time. We include this work, S4PRED, to demonstrate how it is a step upwards in accuracy. In order to avoid conflation with Rosetta *ab initio*, we use the name Rosetta + Neural Network (Rosetta+NN) in this figure to refer to the work of Meiler & Baker<sup>36</sup>.

100 sequences clustered as alignments and then removing the clusters containing a small number of sequences. The  
101 MSA-based PSIPRED V4<sup>22</sup> is then used to generate secondary structure predictions for each remaining cluster  
102 alignment. The representative sequence for each cluster is used as the target sequence when predicting secondary  
103 structure. The target sequence is then kept along with the three-class predictions, and the alignment is discarded. In  
104 this way, each cluster produces a single training example, constituting a single sequence and its pseudo-labels.

105 This approach effectively utilizes a homology-based predictor to provide accurate pseudo-labels for individual  
106 unlabelled sequences. PSIPRED generates high accuracy predictions, so it can be inferred that it's providing highly  
107 plausible secondary structure labels. These labels are, therefore, able to provide valuable biological information  
108 to the S4PRED model during training. Because each sequence is sampled from a separate cluster, there is also  
109 the added benefit of diversity between individual sequences in the dataset. In this work we use the Uniclust30  
110 database<sup>47</sup> to generate a training set, which, after a rigorous process of benchmarking and cross-validation, contains  
111 1.08M sequences with pseudo-labels. To accompany the pseudo-labelled sequences, we construct a labelled dataset  
112 from protein structures in the PDB<sup>9</sup>. Homology with the test set is evaluated by CATH<sup>48</sup> classification. The final  
113 training and validation sets contain 10143 and 534 sequences respectively.

114 To train the S4PRED model using both sets of data we adapt the 'fine-tuning' approach from recent work of  
115 Devlin and collaborators<sup>13</sup>. In the context of S4PRED, fine-tuning consists of first training on the large pseudo-  
116 labelled dataset, after which a small amount of additional training is performed with the labelled dataset. Fine-  
117 tuning in this manner provides an effective and regimented training scheme that incorporates both sets of sequences.  
118 The S4PRED model itself uses a variant of the powerful AWD-LSTM<sup>49</sup> model, a recurrent neural network model  
119 that uses a variety of regularization techniques.

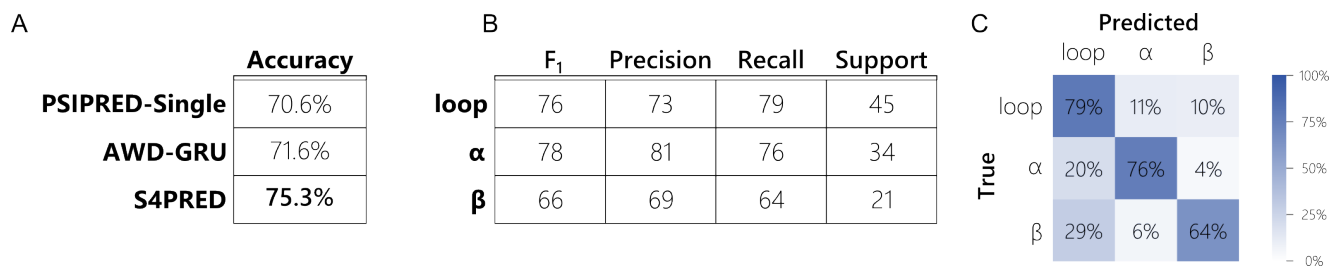

**Figure 2.** (A) Table showing the difference in final accuracy ( $Q_3$  score) between the improved S4PRED, the AWD-GRU benchmark, and the current version of PSIPRED-Single on the CB513 test set. (B) Table of classification metrics for the S4PRED model test set predictions. These are shown for each of the three predicted class;  $\alpha$ -helix,  $\beta$ -sheet, and loop (or coil). The support is normalized across classes to 100 for clarity - there are a total of 84484 residue predictions in the test set. (C) Confusion matrix for the three classes in the S4PRED model test set predictions.

### 120 The prediction of secondary structure from a single sequence

121 The final model achieves an average test set  $Q_3$  score of 75.3%. This improves the  $Q_3$  of PSIPRED-Single by almost  
 122 5% (Figure 2A), currently being 70.6%. This is clearly seen in Figure 3A, which shows how the distribution of test  
 123 set  $Q_3$  scores for S4PRED has improved as a whole from PSIPRED-Single scores. In some cases, this has led to a  
 124 large improvement in prediction accuracy, an example of which is visualized in Figure 3B. Although this represents  
 125 a significant improvement it is not necessarily a fair comparison as PSIPRED-Single uses a much simpler multi-layer  
 126 perceptron model<sup>18,22</sup>.

127 The most comparable method to date is SPIDER3-Single<sup>26</sup> which uses a bidirectional LSTM<sup>50</sup> trained in a  
 128 supervised manner. This method predicts secondary structure and other sequence information, like solvent  
 129 accessibility and torsion angles, from a single sequence. SPIDER3-Single uses one model to make preliminary  
 130 predictions, which are then concatenated with the original input sequence, to be used as input to a second model  
 131 that produces the final predictions. It reports a  $Q_3$  score of 72.5%, however, this is on a non-standard test set based  
 132 on a less stringent definition of homology<sup>3</sup>.

133 To establish an equivalent and informative comparison we provide a second benchmark by training a similar  
 134 supervised model to SPIDER3-Single which predicts only secondary structure in a standard supervised manner,  
 135 without a secondary network. This uses the same network architecture as our SSL method but only trains on the  
 136 labelled sequence dataset. This achieves a  $Q_3$  score of 71.6% on CB513. This is a similar result to that achieved  
 137 in a recent work<sup>27</sup>, which reported a single-sequence  $Q_3$  score of 69.9% and 71.3% on a validation set with a  
 138 perceptron model and a LSTM-based model respectively. Although the second benchmark used here does not  
 139 utilize a secondary prediction network like SPIDER3-Single, it is < 1% less performant than SPIDER3-Single's  
 140 reported test set performance. Importantly, it provides a direct comparison to S4PRED by using the same model and  
 141 test set. We use the name AWD-GRU, after the AWD-LSTM variant<sup>49</sup> used herein, to refer to this benchmark model.

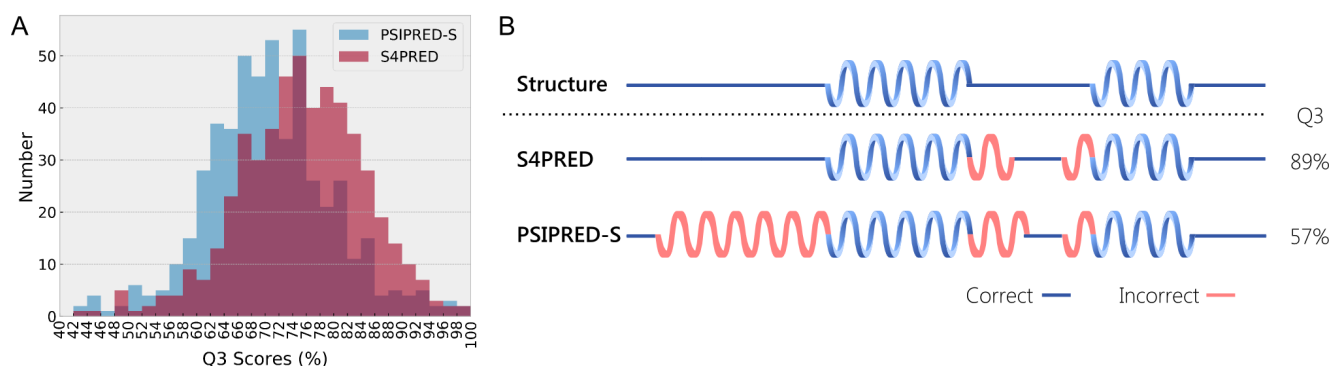

**Figure 3.** (A) Histogram of  $Q_3$  scores on the CB513 test set showing the improved results of S4PRED over PSIPRED-Single (PSIPRED-S). (B) Example of S4PRED and PSIPRED-Single secondary structure predictions relative to the true structure for the C terminal domain of pyruvate oxidase and decarboxylase (PDB ID 1POW).

142 Although they use the same architecture, S4PRED still exceeds the performance of the AWD-GRU benchmark by  
143 a difference in  $Q_3$  of almost 4%. Not only is this a large improvement for single-sequence prediction, it directly  
144 demonstrates the benefit of the SSL approach.

145 To more precisely determine the benefit that fine-tuning contributes to this performance gain, we tested a model  
146 trained on only pseudo-labelled sequences. This achieves a test  $Q_3$  score of 74.4%. As is expected, this demonstrates  
147 that fine-tuning is a functional approach to combining both datasets that markedly improves prediction by  $\sim 1\%$ .  
148 Aside from the obvious benefit of learning from real labelled data, we speculate that part of the fine-tuning  
149 improvement derives from a softening of class decision boundaries. The model trained on only pseudo-labels has  
150 a prediction entropy of 0.325, averaged across classes, residues, and sequences. The final model shows a notably  
151 higher entropy of 0.548 suggesting that fine-tuning is possibly softening classification probabilities and improving  
152 predictions for cases that sit on those boundaries. One clear aspect of S4PRED that should be a focus of future  
153 improvement is  $\beta$ -strand prediction. Of the three classes it has the lowest  $F_1$  score by a reasonable margin, 0.66  
154 compared to 0.78 and 0.76 for loop and helix respectively (Figure 2B). This is likely due to a combination of being  
155 the least represented class in the training set and the most difficult class to predict.

### 156 Data efficiency using the semi-supervised learning approach

157 Another aspect we wished to investigate was the data efficiency of the SSL approach. We trained the AWD-GRU  
158 benchmark model on training sets of different sizes, randomly sampling from the 10143-sequence real-labelled  
159 training set. To a good degree, the test set accuracy linearly increases with the logarithm of the real-labelled training  
160 set size ( $R^2 = 0.92$ ), as can be seen in Figure 4. This trend suggests that the SSL approach simulates having trained on  
161 a real sequence dataset that is  $\sim \times 7.6$  larger. Under the loose assumption that the ratio of PDB structures to labelled  
162 training set size stays the same, there would need to be greater than 1.2M structures in the PDB (as compared to the  
163 162816 entries available as of 04-2020) to achieve the same performance as S4PRED using only real data.

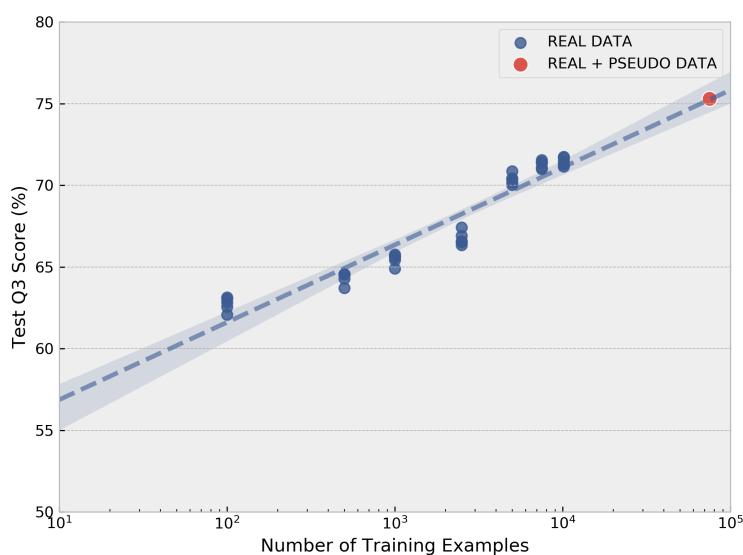

**Figure 4.** Scatter plot comparing the logarithm of the number of data points compared to trained model accuracy with real labelled sequences. A dashed linear trend line is included. The S4PRED model using real and psuedo-labelled data (75.3%) is included as a single point for comparison.

164 We also looked to estimate the number of sequences that would be required in UniProt (Swiss-Prot and TrEMBL)  
165 and other metagenomic sequence resources<sup>51,52</sup> for a PASS-based model to achieve the current performance of  
166 the state-of-the-art homology-based PSIPRED. For each single-sequence method in Figure 1, published since the  
167 inception of CATH<sup>53</sup>, we find the number of CATH S35 sequence families available the year the method was  
168 published. This number servers as a proxy for the number of redundancy-reduced PDB chains that would have  
169 been available for generating a dataset. We perform exponential regression between the  $Q_3$  scores and the number of

170 CATH S35 sequence families. The S4PRED result is included however 1.08M is used for the number of families. The  
171 resulting regression suggests that 25B non-redundant PDBs or sequence clusters would be required for an S4PRED-  
172 like model to reach 84%. We then use the average UniClust30 (2016) sequence cluster depth as a multiplicative  
173 factor to estimate the number of raw sequences needed. This provides a soft estimate of a minimum of 160 Billion  
174 sequences needed for a method based on PASS, like S4PRED, to achieve similar results to current homology based  
175 models.

### 176 Single-sequence prediction in context

177 In this work we consider single-sequence prediction in the strictest sense. This is a model that, for a single example,  
178 provides predictions without using information derived from related sequences or evolutionary information. This  
179 is an important distinction because using even a small number of homologous sequences improves prediction by  
180 several percentage points<sup>33</sup>.

181 The recently published SPOT-1D<sup>28</sup> provides a clear example of this phenomenon. Hanson and collaborators<sup>28</sup>  
182 show  $Q_3$  scores of several homology-based models when predicting with low diversity alignments. The criterion for  
183 this low diversity is having  $N_{eff} < 2$  (a measure of alignment diversity, as provided by HHblits<sup>54</sup>). This is reported  
184 as  $N_{eff} = 1$ , however, all values are rounded down to the nearest integer. This is clearly not a single-sequence  
185 approach. It is also further evidenced in the reported  $Q_3$  scores. Of the methods reported, Porter 5<sup>27,55</sup> achieves  
186 the highest  $Q_3$  with 78%, followed by SPOT-1D at 77%. Separate to these results, Porter 5 reports a validation set  
187  $Q_3$  of 71.3% when trained on only single sequences without profiles<sup>27</sup>. Ignoring the further potential training set  
188 and test set overlap for the values reported in SPOT-1D, this difference in  $Q_3$  clearly demonstrates that using even  
189 low diversity alignments is enough to significantly improve predictive performance, over a purely single-sequence  
190 approach.

191 Information from homologous sequences can also improve results by being present in the bias of a trained model.  
192 A subtle example of this is in the recent DeepSeqVec model<sup>11</sup>, which trained an unsupervised neural network to  
193 produce learned representations of individual sequences from UniRef50<sup>56</sup>. The unsupervised model is subsequently  
194 used to generate features which are used to train a second model that predicts secondary structure. This second  
195 model achieves a  $Q_3$  score of 76.9% on CB513<sup>11</sup>. Although this two model approach is providing secondary structure  
196 predictions for individual sequences, it is not a single-sequence method because the unsupervised model has access  
197 to implicit evolutionary information for both the training set and test set sequences. This is partly due to being  
198 improperly validated, a split was not performed between the training and test sets. With no split the model is  
199 able to learn relationships between test set and training set sequences. It is also due to the training objective of the  
200 underlying ELMo language model<sup>57</sup>. The model is able to learn relationships between homologous sequences in a  
201 shared latent space, especially given that residue representations are optimized by trying to predict what residue is  
202 likely to be found at each position in a given input sequence.

203 Even if the model uses a small amount of evolutionary information, it still precludes it from being a single-  
204 sequence method. The predictions from such a model still benefit from evolutionary information. This not only  
205 highlights the difficulty in developing accurate methods that are strictly single-sequence, it also highlights how  
206 achieving a  $Q_3$  score of 75.3% with S4PRED represents a step up in performance for single-sequence methods.

## 207 Discussion

208 Secondary structure prediction from the typical homology-based perspective has improved year-on-year and  
209 published  $Q_3$  scores are beginning to rise above 85%. Looking at the history of approaches in the field, the general  
210 pattern of methods has remained largely the same; that is, it remains a standard supervised prediction task<sup>23</sup>. In  
211 this context, it is easy to assume that the steady rise in model performance seen over the past two decades has  
212 resulted from some combination of more powerful classifiers and larger databases. There is a strong argument that  
213 a significant majority of the improvements have come from the increase in data available. Model performance is  
214 generally a monotonically increasing function of the amount of data and the number of structures in the PDB has  
215 increased by an order of magnitude since the turn of the millennium<sup>9</sup>.

216 It is non-trivial to disentangle the exact relationship between the amount of data available and model per-  
217 formance but the different versions of PSIPRED provide a valuable insight. From an architecture and training  
218 perspective, the current version<sup>22</sup> (V4) remains mostly similar to the original first published model<sup>18</sup>, yet the current  
219 version is a state-of-the-art model under strict testing criteria<sup>22</sup>. The primary difference between versions is the  
220 much larger available pool of training examples. This suggests strongly that the primary bottleneck on performance  
221 has been data availability.

Looking to single-sequence prediction, it stands to reason that methods have improved relatively little over time. Data availability, or more generally the amount of information available to a classifier, appears to be a driving force in performance, and by their very nature single-sequence methods have much less available information. This is likely applicable across many orphan sequence modelling tasks, not just secondary structure prediction<sup>5,6</sup>. In this work we developed and applied the PASS framework to directly tackle this issue of data availability. This led to the development of S4PRED which, in achieving a leap in single-sequence performance, stands as an exemplar to the effectiveness of the PASS approach. PASS, and S4PRED, leverages a semi-supervised approach to provide a neural network classifier with information from over a million sequences. Not only is this successful, it is also a conceptually simple approach. A homology based method (in this case PSIPRED) is used to generate accurate labels for unlabelled examples. The new example and label pairs are then combined with real-labelled data and used to train a single-sequence based predictor.

S4PRED has achieved significant progress in improving single-sequence secondary structure prediction, but there is still much work to be done. There remains an 8-9% performance gap between S4PRED and current state-of-the-art homology-based methods<sup>23</sup>. Given the importance of data availability, an immediate question that arises is whether the best approach to closing the gap is to simply wait for larger sequence databases to be available in the near future. To an extent, this appears to be a feasible approach. The number of entries in UniProt grows every year<sup>1</sup> and a massive amount of data is available from clustered metagenomic sequences in databases like the BFD<sup>58,59</sup>.

It is likely that increasing the training set every year will improve performance but to what extent is unknown and the computational cost will correspondingly increase. An increase in training set size will also be dictated by an increase in the number of new families in a database (a sequence cluster being a proxy for a family) and not the number of new sequences. Our estimations suggest that 160 Billion sequences would be required to match homology levels of performance with a PASS method. Given the speed at which sequence databases are growing<sup>1,59</sup> this is not unreasonable, but unlikely to be within reach in the near future. In short, there is no clear indication that waiting for larger databases will bring single-sequence performance to the level of homology-based prediction, although it will bring some improvement. Instead, a focus on methodological improvements stands to yield the best results.

Looking forward, it is always difficult to speculate what specific methods will result in further improvements. Continuing from the perspective of secondary structure prediction, the field has, in recent years, focused on developing larger and more complex neural networks<sup>23</sup>. There is certainly a benefit to this approach. Prototyping tends to be quick so any improvements found can be shared with the scientific community quickly. For many novel architectures, code is often available and straightforward to adapt into pre-existing secondary structure pipelines due to the pervasive use of auto-differentiation packages like Pytorch<sup>60</sup> and Tensorflow<sup>61</sup>. A concrete example of this approach would be to adapt multi-headed self-attention to secondary structure prediction and other single sequence prediction fields, having shown significant success in natural language processing<sup>13</sup>.

Unfortunately, there is limited novelty in this overall approach and, most importantly, the results of applying the PASS framework suggest that there are only small gains to be had. Waiting for databases to grow in size, and for the development of more complex network architectures, is unlikely to be the answer. Instead, focusing on developing methods that provide pre-existing models with more prediction-relevant information will likely result in the most significant progress. Admittedly this is an easy concept to pose, and more difficult to execute, but PASS and S4PRED demonstrates that it is possible.

The most obvious approach to this kind of development is to explore further techniques from semi-supervised learning. Methods like data augmentation, that have shown success with image data<sup>14,15</sup>, would be ideal in getting the most out of the data that is available. Unfortunately, it is nontrivial to augment biological sequences even when the structure or function is known which makes data augmentation a difficult approach to pursue<sup>46</sup>. That being said, homologues of a given sequence in the training set can loosely be viewed as biologically valid augmentations of the original target sequence. From this perspective, including multiple pseudo-labelled sequences from each cluster as separate examples, instead of the current method which only includes a single target sequence from each cluster, could be viewed as a proxy for data augmentation. Another approach to improving results may be to train models like S4PRED to predict the class probabilities outputted by the label-providing homology model, instead of predicting the hard class assignments, in a manner similar to Knowledge Distillation<sup>62</sup>. The soft-label information may assist the classifier, although in classification tasks with a small number of classes this information may not contribute significantly. A more general method like MixUp<sup>63</sup>, that is application domain agnostic, might also improve classification by improving the classifiers overall generalizability. Suffice it to say, the semi-supervised approach of PASS brings with it a variety of potential ways to improve performance by directly providing more information to the classifier.

277 Given the unprecedented success of S4PRED, PASS provides a simple blueprint from which further methods  
278 can be developed for modelling orphan sequences. An obvious first step with protein sequences is looking to  
279 predict other residue level labels like solvent accessibility<sup>64</sup> and torsion angle prediction<sup>26</sup>. This could be taken  
280 even further and be applied to the nefariously difficult task of protein contact prediction<sup>2</sup>. PASS could also be  
281 applied to other biological sequences, such as in the prediction of RNA annotations<sup>65</sup>. Extending PASS to other  
282 prediction tasks in the future will also likely be aided by recent efforts to consolidate databases of sequences with  
283 pre-calculated predictions of various attributes from a range of tools. One such example being the residue-level  
284 predictions provided in DescribePROT<sup>66</sup>. As more of the protein universe is discovered the need for methods  
285 that are independent of homology only grows. Methods like S4PRED will hopefully come to represent a growing  
286 response to this need, the PASS framework providing a path forward. With this in mind we provide S4PRED as an  
287 open source tool and as an option on the PSIPRED web service.

## 288 **Methods**

### 289 **Labelled dataset construction**

290 The first stage in our construction of a labelled dataset is generating a non-redundant set of PDB chains using the  
291 PISCES server<sup>67</sup> with a maximum identity between structures of 70% and a maximum resolution of 2.6Å. This  
292 produces a list of 30630 chains, all with a length of 40 residues or more. At the cost of introducing some noise but  
293 retaining more examples we do not remove any chains with unlabelled residues.

294 From this list we then remove any chains that share homology with the test set. We use the standard test set for  
295 secondary structure prediction, CB513. Homology is assessed and qualified as having any overlapping CATH<sup>48</sup>  
296 domains at the Superfamily level with any of the sequences in the test set<sup>3</sup>. This removes approximately 2/3 of the  
297 chains leaving a total of 10677 from which to generate training and validation sets.

298 The remaining chains are clustered at 25% identity using MMseqs2<sup>68</sup>. From the resulting 6369 clusters, a subset  
299 is randomly sampled such that the total sum of their sequences makes up ~ 5% of the 10677 chains. This is to create  
300 a validation set that achieves a 95%/5% split between training and validation sets, as well as keeping the validation  
301 and test sets similarly sized. This leaves a final split of 10143/534/513 examples for the training, validation, and  
302 test sets respectively.

303 Secondary structures are specified using DSSP<sup>69</sup>. For each residue in each sequence the eight states (H, I, G,  
304 E, B, S, T, -) are converted to the standard 3 classes ( $Q_3$ ) of strand for E & B, helix for H & G, and loop (coil) for  
305 the remainder. Protein sequences are represented as a sequence of amino acids, where each residue is represented  
306 by one of 21 integers; twenty for the canonical amino acids and one for "X" corresponding to unknown and  
307 non-canonical amino acids. Each integer represents an index to an embedding that is learned during the training of  
308 the neural network models.

### 309 **Pseudo-labelled dataset generation**

310 To assemble a dataset of pseudo-labelled sequences we start with UniClust30 (January 2020 release)<sup>47</sup>. This consists  
311 of UniProtKB<sup>1</sup> sequences clustered to 30% identity, making up 23.8M clusters. Each cluster is then considered as a  
312 single potential example for the pseudo-labelled training set. Any cluster can be converted into a target sequence  
313 and alignment which can then be passed to PSIPRED to generate high accuracy predictions of secondary structure.  
314 These predictions are then one-hot encoded and treated as pseudo-labels with the target sequence providing a  
315 single example.

316 Clusters are filtered from the initial 23.8M UniClust30 set by removing clusters that are either too short or have  
317 too few sequence members. If a cluster has a representative sequence with a length of less than 20 residues or  
318 contains less than 10 non-redundant sequences in its alignment it is removed. Applying these restrictions leaves  
319 a much smaller set of 1.41M clusters. These are the candidate clusters for generating a training set from which  
320 homology with the validation and test sets is to be removed.

### 321 **Removal of test set homology from the pseudo-labelled dataset**

322 Models trained on labelled and pseudo-labelled data use the same CB513<sup>17</sup> test set. This consistency provides a  
323 means of directly comparing S4PRED with models trained separately on only labelled data, namely, PSIPRED-Single  
324 and the AWD-GRU. The same real-labelled validation set is also used, ensuring that all validation sequences used  
325 in this work are structurally non-homologous with the test set.

326 For the vast majority of clusters, solved structures are not available. This leaves sequence-based approaches to  
327 identify and eliminate clusters that share any homology with the test set. It is widely known that using a simple



percent identity (e.g. 30%) as a homology threshold between two sequences is inadequate and leads to data leakage<sup>3</sup>. As such we employ a rigorous and multifaceted approach to removing clusters that are homologous to the test set.

The first step is performing HMM-HMM homology searching for each member of CB513 with `HHblits`<sup>54</sup> using one iteration and an E-value of 10 against the remaining clusters. An accurate means of homology detection, using a high E-value also provides an aggressive sweep to capture any positive matches at the expense of a small number of false hits. One iteration was performed as this was broadly found to return more hits. For the validation set, the same procedure is followed, however the default E-value ( $1 \times 10^{-3}$ ) is used with two iterations. All clusters that are matches to the test and validation sets are then removed.

The remaining clusters are copied and combined to create a single large sequence database which is processed with `pFilt`<sup>70</sup> to mask regions of low amino acid complexity. The test set alignments produced by `HHblits` are used to construct `HMMER`<sup>71</sup> HMMs which are then used to perform HMM-sequence homology searches against the sequence database using `hmmsearch`. The `-max` flag is used to improve sensitivity and the default e-value is used. All sequences that are positive hits, along with their respective clusters, are removed from the remaining set.

A secondary and overlapping procedure is also performed. Each member of the test set is mapped to one or more Pfam<sup>72</sup> families by pre-existing annotations. These are found by a combination of SIFTS<sup>73</sup> and manual searching. From the test set, 17 structures were not found to belong to any Pfam family. For each Pfam family linked to the remaining members of the test set, a list of UniProt sequence IDs is generated. This is extracted from the family's current UniProt-based Pfam alignment (01-2020) and is used to remove clusters following the same procedure as positive hits from the HMM-sequence search.

In total these methods remove approximately a quarter of the initial 1.41M clusters, leaving a final 1.08M clusters to construct a pseudo-labelled training set. While the fear of data leakage remains ever present, we believe that in the absence of structures this process constitutes a rigorous and exhaustive approach to homology removal.

### Generating pseudo-labels with PSIPRED

A given cluster can provide a sequence with pseudo-labels by first taking its representative sequence as the target sequence and splitting off the remainder of the cluster alignment. This is treated as if it was the target sequence alignment. Both sequence and alignment are then processed using the standard PSIPRED procedure. The three-class secondary structure labels predicted by PSIPRED V4<sup>22</sup> are then kept along with the target sequence as a single example for the training set. The version of PSIPRED used to generate labels is trained on a set of sequences that are structurally non-homologous with the CB513 test set. This ensures that the pseudo-labels contain no information derived from the test set implicitly through PSIPRED. This procedure is repeated to generate a training set of 1.08M sequences each paired with a sequence of pseudo-labels.

### Model architecture

We use a state-of-the-art recurrent neural network (RNN) from the language modelling domain as a classification model. More specifically we adapt the AWD-LSTM<sup>49</sup> for secondary structure prediction. The first portion of our model takes a sequence of amino acids encoded as integers and replaces them with corresponding 128-d embeddings that are learned during training and are initialized from  $\mathcal{N}(0,1)$ . During training a 10% dropout is applied to the embeddings.

The embeddings are fed into a bidirectional gated recurrent unit (GRU)<sup>74</sup> model with 1024 hidden dimensions in each direction. Here the model differs from the AWD-LSTM which utilizes a long short term memory (LSTM) model with DropConnect<sup>75</sup> applied to the hidden-to-hidden weight matrices. Our model does the same but utilizes a GRU which we refer to as an AWD-GRU. Unless specified, the weight dropping is set to 50% during training. This model utilizes three layers of AWD-GRUs with 10% dropout applied between each layer during training.

The output of the final recurrent layer is a 2048-d vector at each time step. This is fed into a final linear layer with a log softmax operation to produce the 3-class probabilities at each residue position. These are then used to calculate a negative log likelihood loss using the corresponding one-hot encoded labels. Unlike the original AWD-LSTM we use another popular stochastic gradient descent (SGD) variant, Adam<sup>76</sup>, as an optimizer to minimize the loss and train model parameters.

### S4PRED training with pseudo-labelled data

The first stage in training the S4PRED model is training on the 1.08M pseudo-labelled sequences. For optimization the Adam beta terms are set to  $\beta_1, \beta_2 = \{0.9, 0.999\}$  with an initial learning rate of  $1 \times 10^{-4}$  and a mini-batch size of 256. We also perform gradient clipping with a maximum norm of 0.25. To utilize a batch size of greater than 1 all batches are padded on the fly to the length of the longest sequence in a given batch. The padding symbol has a corresponding embedding and the loss is masked at positions that are padded. Training occurs for up to 10 epochs

381 which typically takes between 48 to 72 hours in total. The performance on the validation set is tested every 100  
382 batches and it is used to perform early stopping.

### 383 **Fine-tuning with labelled data**

384 We adapt the methodology presented by Devlin and collaborators<sup>13</sup> for S4PRED by taking the model trained on  
385 pseudo-labelled sequences and performing 1 epoch of training on the 10K labelled sequences. Unlike their method,  
386 however, we do not need an additional output layer, having already trained on the semi-supervised secondary  
387 structure prediction objective with the pseudo-labelled sequences. For fine-tuning, the batch size is lowered to 32  
388 and the weight drop is set to 0%. All other hyper-parameters are kept the same and the Adam optimizer is reset.  
389 The final model is an ensemble of 5 models fine-tuned with different random seeds, all starting from the same  
390 model. Using an ensemble improves prediction by  $\sim 0.1\%$ .

### 391 **Performance benchmarking**

392 Two methods are used to benchmark the results of S4PRED. The first method is the original PSIPRED-Single. Its  
393 predictions are generated using the pipeline included with PSIPRED V4. PSIPRED-Single achieves a  $Q_3$  score of  
394 70.6% on CB513. The AWD-GRU model is the second model used for benchmarking. It is trained with the same  
395 model architecture and hyper-parameters as S4PRED when it is being trained on the pseudo-labelled set before  
396 fine-tuning. However, it only trains on the 10143-sequence set with real labels. This achieves a  $Q_3$  score of 71.6%  
397 also on CB513.

398 The data efficiency of the S4PRED method was investigated to estimate the value of training with pseudo-  
399 labelled data. This was done by training five versions of the AWD-GRU model, each with a different random seed,  
400 on different sized subsets of the 10143 real labelled data. Models were trained with 100, 500, 1000, 2500, 5000, 7500,  
401 & 10143 examples (a total of 35 models). Each model is tested against CB513 and a linear regression model is fit  
402 between the logarithm of the number of points and model  $Q_3$  score ( $R^2 = 0.92$ ). This is visualized in Figure S4. By  
403 the linear model, a  $Q_3$  score of 75.3% would require 77K real labelled sequences in the dataset.

### 404 **Software implementation**

405 All analysis was performed using Python and all neural network models were built and trained using Pytorch<sup>60</sup>.  
406 During training, all models used mixed precision which was implemented using the NVIDIA Apex package with  
407 the `-O2` flag. This was found to improve training speeds with a negligible effect on results. Individual models  
408 were trained on a single compute cluster node using an NVIDIA V100 32GB GPU. Upon publication, the S4PRED  
409 model and AWD-GRU model with their weights will be released as open source software on the PSIPRED GitHub  
410 repository (<https://github.com/psipred/>) along with documentation. It will also be provided as a part of  
411 the PSIPRED web service (<http://bioinf.cs.ucl.ac.uk/psipred/>).

### 412 **Acknowledgements**

413 We thank members of the group for valuable discussions and comments. This work was supported by the European  
414 Research Council Advanced Grant 'ProCovar' (project ID 695558) and by the Francis Crick Institute which receives  
415 its core funding from Cancer Research UK (FC001002), the UK Medical Research Council (FC001002), and the  
416 Wellcome Trust (FC001002).

### 417 **Author contributions**

418 L.M. and D.T.J. conceived and designed the study and reviewed the manuscript. L.M. carried out the computational  
419 work and drafted the manuscript.

### 420 **Competing interests**

421 The authors declare no competing interests.

### 422 **References**

423 1. UniProt-Consortium. Uniprot: a worldwide hub of protein knowledge. *Nucleic acids research* **47**, D506–D515  
424 (2019).

- 425 2. Kandathil, S. M., Greener, J. G. & Jones, D. T. Recent developments in deep learning applied to protein structure  
426 prediction. *Proteins: Struct. Funct. Bioinforma.* **87**, 1179–1189 (2019).
- 427 3. Jones, D. T. Setting the standards for machine learning in biology. *Nat. Rev. Mol. Cell Biol.* **20**, 659–660 (2019).
- 428 4. Senior, A. W. *et al.* Improved protein structure prediction using potentials from deep learning. *Nature* **577**,  
429 706–710 (2020).
- 430 5. Greener, J. G., Kandathil, S. M. & Jones, D. T. Deep learning extends de novo protein modelling coverage of  
431 genomes using iteratively predicted structural constraints. *Nat. communications* **10**, 1–13 (2019).
- 432 6. Perdigão, N. *et al.* Unexpected features of the dark proteome. *Proc. Natl. Acad. Sci.* **112**, 15898–15903 (2015).
- 433 7. Levitt, M. Nature of the protein universe. *Proc. Natl. Acad. Sci.* **106**, 11079–11084 (2009).
- 434 8. Blum, M. *et al.* The InterPro protein families and domains database: 20 years on. *Nucleic Acids Res.* (2020).
- 435 9. Burley, S. K. *et al.* Rcsb protein data bank: biological macromolecular structures enabling research and education  
436 in fundamental biology, biomedicine, biotechnology and energy. *Nucleic acids research* **47**, D464–D474 (2019).
- 437 10. Alley, E. C., Khimulya, G., Biswas, S., AlQuraishi, M. & Church, G. M. Unified rational protein engineering  
438 with sequence-based deep representation learning. *Nat. methods* **16**, 1315–1322 (2019).
- 439 11. Heinzinger, M. *et al.* Modeling aspects of the language of life through transfer-learning protein sequences. *BMC*  
440 *bioinformatics* **20**, 723 (2019).
- 441 12. Dai, Z. *et al.* Transformer-xl: Attentive language models beyond a fixed-length context. *arXiv preprint*  
442 *arXiv:1901.02860* (2019).
- 443 13. Devlin, J., Chang, M.-W., Lee, K. & Toutanova, K. Bert: Pre-training of deep bidirectional transformers for  
444 language understanding. In *Proceedings of the 2019 Conference of the North American Chapter of the Association for*  
445 *Computational Linguistics*, 4171–4186 (2019).
- 446 14. Sohn, K. *et al.* Fixmatch: Simplifying semi-supervised learning with consistency and confidence. *arXiv preprint*  
447 *arXiv:2001.07685* (2020).
- 448 15. Berthelot, D. *et al.* Mixmatch: A holistic approach to semi-supervised learning. In *Advances in Neural Information*  
449 *Processing Systems*, 5049–5059 (2019).
- 450 16. Lee, D.-H. Pseudo-label: The simple and efficient semi-supervised learning method for deep neural networks.  
451 In *Workshop on challenges in representation learning, ICML*, vol. 3 (2013).
- 452 17. Cuff, J. A. & Barton, G. J. Evaluation and improvement of multiple sequence methods for protein secondary  
453 structure prediction. *Proteins: Struct. Funct. Bioinforma.* **34**, 508–519 (1999).
- 454 18. Jones, D. T. Protein secondary structure prediction based on position-specific scoring matrices. *J. molecular*  
455 *biology* **292**, 195–202 (1999).
- 456 19. Liu, P. *et al.* Insights into the assembly and activation of the microtubule nucleator  $\gamma$ -turb. *Nature* **578**, 467–471  
457 (2020).
- 458 20. Wagner, F. R. *et al.* Structure of swi/snf chromatin remodeller rsc bound to a nucleosome. *Nature* **579**, 448–451  
459 (2020).
- 460 21. Marcos, E. & Silva, D.-A. Essentials of de novo protein design: Methods and applications. *Wiley Interdiscip. Rev.*  
461 *Comput. Mol. Sci.* **8**, e1374 (2018).
- 462 22. Buchan, D. W. & Jones, D. T. The psipred protein analysis workbench: 20 years on. *Nucleic acids research* **47**,  
463 W402–W407 (2019).
- 464 23. Yang, Y. *et al.* Sixty-five years of the long march in protein secondary structure prediction: the final stretch?  
465 *Briefings bioinformatics* **19**, 482–494 (2018).
- 466 24. Altschul, S. F. *et al.* Gapped blast and psi-blast: a new generation of protein database search programs. *Nucleic*  
467 *acids research* **25**, 3389–3402 (1997).
- 468 25. Bidargaddi, N. P., Chetty, M. & Kamruzzaman, J. Combining segmental semi-markov models with neural  
469 networks for protein secondary structure prediction. *Neurocomputing* **72**, 3943–3950 (2009).
- 470 26. Heffernan, R. *et al.* Single-sequence-based prediction of protein secondary structures and solvent accessibility  
471 by deep whole-sequence learning. *J. computational chemistry* **39**, 2210–2216 (2018).

- 472 27. Torrisi, M., Kaleel, M. & Pollastri, G. Deeper profiles and cascaded recurrent and convolutional neural networks  
473 for state-of-the-art protein secondary structure prediction. *Sci. reports* **9**, 1–12 (2019).
- 474 28. Hanson, J., Paliwal, K., Litfin, T., Yang, Y. & Zhou, Y. Improving prediction of protein secondary structure,  
475 backbone angles, solvent accessibility and contact numbers by using predicted contact maps and an ensemble  
476 of recurrent and residual convolutional neural networks. *Bioinformatics* **35**, 2403–2410 (2019).
- 477 29. Rost, B. Protein secondary structure prediction continues to rise. *J. structural biology* **134**, 204–218 (2001).
- 478 30. Asai, K., Hayamizu, S. & Handa, K. Prediction of protein secondary structure by the hidden markov model.  
479 *Bioinformatics* **9**, 141–146 (1993).
- 480 31. Frishman, D. & Argos, P. Incorporation of non-local interactions in protein secondary structure prediction from  
481 the amino acid sequence. *Protein Eng. Des. Sel.* **9**, 133–142 (1996).
- 482 32. Schmidler, S. C., Liu, J. S. & Brutlag, D. L. Bayesian segmentation of protein secondary structure. *J. computational*  
483 *biology* **7**, 233–248 (2000).
- 484 33. Aydin, Z., Altunbasak, Y. & Borodovsky, M. Protein secondary structure prediction for a single-sequence using  
485 hidden semi-markov models. *BMC bioinformatics* **7**, 178 (2006).
- 486 34. Rost, B., Sander, C. *et al.* Prediction of protein secondary structure at better than 70% accuracy. *J. molecular*  
487 *biology* **232**, 584–599 (1993).
- 488 35. Cuff, J. A., Clamp, M. E., Siddiqui, A. S., Finlay, M. & Barton, G. J. Jpred: a consensus secondary structure  
489 prediction server. *Bioinforma. (Oxford, England)* **14**, 892–893 (1998).
- 490 36. Meiler, J. & Baker, D. Coupled prediction of protein secondary and tertiary structure. *Proc. Natl. Acad. Sci.* **100**,  
491 12105–12110 (2003).
- 492 37. Cole, C., Barber, J. D. & Barton, G. J. The jpred 3 secondary structure prediction server. *Nucleic acids research* **36**,  
493 W197–W201 (2008).
- 494 38. Mirabello, C. & Pollastri, G. Porter, paleale 4.0: high-accuracy prediction of protein secondary structure and  
495 relative solvent accessibility. *Bioinformatics* **29**, 2056–2058 (2013).
- 496 39. Li, Z. & Yu, Y. Protein secondary structure prediction using cascaded convolutional and recurrent neural  
497 networks. *arXiv preprint arXiv:1604.07176* (2016).
- 498 40. Ovchinnikov, S. *et al.* Protein structure determination using metagenome sequence data. *Science* **355**, 294–298  
499 (2017).
- 500 41. Mokili, J. L., Rohwer, F. & Dutilh, B. E. Metagenomics and future perspectives in virus discovery. *Curr. opinion*  
501 *virology* **2**, 63–77 (2012).
- 502 42. Edwards, R. A. & Rohwer, F. Viral metagenomics. *Nat. Rev. Microbiol.* **3**, 504–510 (2005).
- 503 43. Riesselman, A. J., Ingraham, J. B. & Marks, D. S. Deep generative models of genetic variation capture the effects  
504 of mutations. *Nat. methods* **15**, 816–822 (2018).
- 505 44. Koga, N. *et al.* Principles for designing ideal protein structures. *Nature* **491**, 222–227 (2012).
- 506 45. Yang, K. K., Wu, Z. & Arnold, F. H. Machine-learning-guided directed evolution for protein engineering. *Nat.*  
507 *methods* **16**, 687–694 (2019).
- 508 46. Kandathil, S. M., Greener, J. G. & Jones, D. T. Prediction of interresidue contacts with deepmetapsicov in casp13.  
509 *Proteins: Struct. Funct. Bioinforma.* **87**, 1092–1099 (2019).
- 510 47. Mirdita, M. *et al.* Uniclust databases of clustered and deeply annotated protein sequences and alignments.  
511 *Nucleic acids research* **45**, D170–D176 (2017).
- 512 48. Sillitoe, I. *et al.* Cath: expanding the horizons of structure-based functional annotations for genome sequences.  
513 *Nucleic acids research* **47**, D280–D284 (2019).
- 514 49. Merity, S., Keskar, N. S. & Socher, R. Regularizing and optimizing LSTM language models. In *6th International*  
515 *Conference on Learning Representations, ICLR 2018, Vancouver, BC, Canada, April 30 - May 3, 2018, Conference Track*  
516 *Proceedings* (OpenReview.net, 2018).
- 517 50. Hochreiter, S. & Schmidhuber, J. Long short-term memory. *Neural computation* **9**, 1735–1780 (1997).
- 518 51. Mitchell, A. L. *et al.* Mgnify: the microbiome analysis resource in 2020. *Nucleic acids research* **48**, D570–D578  
519 (2020).

- 520 **52.** Carradec, Q. *et al.* A global ocean atlas of eukaryotic genes. *Nat. communications* **9**, 1–13 (2018).
- 521 **53.** Orengo, C. A. *et al.* Cath—a hierarchic classification of protein domain structures. *Structure* **5**, 1093–1109 (1997).
- 522 **54.** Remmert, M., Biegert, A., Hauser, A. & Söding, J. Hhblits: lightning-fast iterative protein sequence searching by  
523 hmm-hmm alignment. *Nat. methods* **9**, 173 (2012).
- 524 **55.** Torrisi, M., Kaleel, M. & Pollastri, G. Porter 5: fast, state-of-the-art ab initio prediction of protein secondary  
525 structure in 3 and 8 classes. *bioRxiv* 289033 (2018).
- 526 **56.** Suzek, B. E. *et al.* Uniref clusters: a comprehensive and scalable alternative for improving sequence similarity  
527 searches. *Bioinformatics* **31**, 926–932 (2015).
- 528 **57.** Peters, M. E. *et al.* Deep contextualized word representations. In *Proceedings of NAACL-HLT*, 2227–2237 (2018).
- 529 **58.** Steinegger, M. & Söding, J. Clustering huge protein sequence sets in linear time. *Nat. communications* **9**, 1–8  
530 (2018).
- 531 **59.** Steinegger, M., Mirdita, M. & Söding, J. Protein-level assembly increases protein sequence recovery from  
532 metagenomic samples manyfold. *Nat. methods* **16**, 603–606 (2019).
- 533 **60.** Paszke, A. *et al.* Pytorch: An imperative style, high-performance deep learning library. In *Advances in Neural  
534 Information Processing Systems*, 8024–8035 (2019).
- 535 **61.** Abadi, M. *et al.* Tensorflow: A system for large-scale machine learning. In *12th {USENIX} symposium on  
536 operating systems design and implementation ({OSDI} 16)*, 265–283 (2016).
- 537 **62.** Hinton, G., Vinyals, O. & Dean, J. Distilling the knowledge in a neural network. *arXiv preprint arXiv:1503.02531*  
538 (2015).
- 539 **63.** Zhang, H., Cissé, M., Dauphin, Y. N. & Lopez-Paz, D. mixup: Beyond empirical risk minimization. In *6th  
540 International Conference on Learning Representations, ICLR 2018, Vancouver, BC, Canada, April 30 - May 3, 2018,  
541 Conference Track Proceedings* (OpenReview.net, 2018).
- 542 **64.** Rost, B. & Sander, C. Conservation and prediction of solvent accessibility in protein families. *Proteins: Struct.  
543 Funct. Bioinforma.* **20**, 216–226 (1994).
- 544 **65.** Hanumanthappa, A. K., Singh, J., Paliwal, K., Singh, J. & Zhou, Y. Single-sequence and profile-based prediction  
545 of rna solvent accessibility using dilated convolutional neural network. *Bioinformatics* (2020).
- 546 **66.** Zhao, B. *et al.* Describeprot: database of amino acid-level protein structure and function predictions. *Nucleic  
547 Acids Res.* **1** (2020).
- 548 **67.** Wang, G. & Dunbrack Jr, R. L. Pisces: a protein sequence culling server. *Bioinformatics* **19**, 1589–1591 (2003).
- 549 **68.** Steinegger, M. & Söding, J. Mmseqs2 enables sensitive protein sequence searching for the analysis of massive  
550 data sets. *Nat. biotechnology* **35**, 1026–1028 (2017).
- 551 **69.** Kabsch, W. & Sander, C. Dssp: definition of secondary structure of proteins given a set of 3d coordinates.  
552 *Biopolymers* **22**, 2577–2637 (1983).
- 553 **70.** Jones, D. T. & Swindells, M. B. Getting the most from psi-blast. *Trends Biochem. Sci.* **27**, 161–164 (2002).
- 554 **71.** Eddy, S. R. Accelerated profile hmm searches. *PLoS computational biology* **7** (2011).
- 555 **72.** El-Gebali, S. *et al.* The pfam protein families database in 2019. *Nucleic acids research* **47**, D427–D432 (2019).
- 556 **73.** Dana, J. M. *et al.* Sifts: updated structure integration with function, taxonomy and sequences resource allows  
557 40-fold increase in coverage of structure-based annotations for proteins. *Nucleic acids research* **47**, D482–D489  
558 (2019).
- 559 **74.** Cho, K. *et al.* Learning phrase representations using rnn encoder–decoder for statistical machine translation. In  
560 *Proceedings of the 2014 Conference on Empirical Methods in Natural Language Processing (EMNLP)*, 1724–1734 (2014).
- 561 **75.** Wan, L., Zeiler, M., Zhang, S., LeCun, Y. & Fergus, R. Regularization of neural networks using dropconnect. In  
562 *30th International Conference on Machine Learning, ICML 2013*, 2095–2103 (International Machine Learning Society  
563 (IMLS), 2013).
- 564 **76.** Kingma, D. P. & Ba, J. Adam: A method for stochastic optimization. In Bengio, Y. & LeCun, Y. (eds.) *3rd  
565 International Conference on Learning Representations, ICLR 2015, San Diego, CA, USA, May 7-9, 2015, Conference  
566 Track Proceedings* (2015).
